# Supplementary material for: Moving IS Project Control Research into the Digital Era: The “Why” of Control and the Concept of Control Purpose
Source: Atypon-hosted journal article supplement (doi:10.1287/isre.2019.0867), 2019-10-31
Supplement: isre.2019.0867.sm1.pdf [file isre.2019.0867.sm1.pdf]

# **Moving IS Project Control Research into the Digital Era: The ‘Why’ of Control and the Concept of Control Purpose**

Martin Wiener, Magnus Mähring, Ulrich Remus, Carol Saunders, W. Alec Cram

## ***Online Appendices A-B***

### **Online Appendix A: Secondary Case Analysis (Methodology)**

To evaluate the concept of control purpose, we considered the 57 articles included in a recent review of the IS project control literature (Wiener et al. 2016). We then employed secondary case analysis, which refers to using pre-existing case data and their associated analysis as primary data to generate new insights or theory (Hanson 2010). Here, in line with the approach used by Gallivan (2001), we defined a list of selection criteria and chose an appropriate content-analysis approach.

Two main criteria were applied to select the articles to be included in the secondary case analysis: First, we limited our sample to qualitative (case) research. This criterion enabled us to develop a more detailed understanding of the described IS project controls and the context in which they were used, and therefore to carefully map value-appropriation concerns and value-creation requirements onto the reported study results. Second, the articles needed to contain empirical data and original analysis; that is, the authors themselves must have studied the control of one or more IS projects. On this basis, we finally selected 21 publications (17 journal articles and four conference papers) for inclusion in our analysis. The publications span a time period of almost 20 years (1996-2014). Thirteen of them examine internal IS projects and eight examine (offshore) outsourced projects.

To analyze the theoretical focus of the selected articles and the case studies included in these articles, we used the software *NVivo*. We first analyzed each article in terms of how it defines control. Next, two members of the author team thoroughly read the case-context (if applicable) and case-results sections of each article in an iterative manner to identify statements and interview quotes that explicitly or implicitly refer to manifestations of controls targeted at value-appropriation concerns or value-creation requirements (see Table A1 for coding examples). In this process, we attached conceptual labels to relevant text passages by using an initial coding scheme. To define this scheme, we drew on key concepts of agency theory, such as goal incongruence and information asymmetry (value-appropriation concerns), as well as on concepts related to stewardship theory, such as cooperation and knowledge exchange (value-creation requirements). In particular, we searched for case data that enabled us to relate a given control purpose to the use of specific controls (see “Control Mode(s)” in Table A1). Especially in the first iterations of the data-analysis process, we applied a traditional form of content analysis, whereby we approached the collected data with predefined concepts and searched for text passages that embodied these concepts (Andren 1981, Gallivan 2001). During the data analysis, we iteratively refined and extended our initial coding scheme by codes that emerged from our line-by-line coding in order to remain open to uncover new phenomena (Eisenhardt 1989).

Preliminary coding results were repeatedly discussed with other members of the author team to develop a shared understanding and resolve ambiguities. Through these discussions, we developed a consensus view of the coding results. Here, the authors alternated between constructive and critical positions (Eisenhardt 1989), which helped consolidate the coding scheme and ensure that the codes were applied consistently across the case data. In addition, one member of the author team (not involved in the previous coding) independently coded a subset

of four articles—two on internal and outsourced IS projects each—from the 21 articles (19%). Inter-rater reliability was high as indicated by a kappa value of 0.728. According to Landis and Koch (1977), kappa values within the range from 0.61 to 0.80 are considered “substantial agreement” (p. 165).

**Table A1.** Coding Examples

| Reference                              | Quote                                                                                                                                                                                                                                                                                                                                                                                                                                                   | Control Purpose (Code)                                   | Control Mode(s)                |
|----------------------------------------|---------------------------------------------------------------------------------------------------------------------------------------------------------------------------------------------------------------------------------------------------------------------------------------------------------------------------------------------------------------------------------------------------------------------------------------------------------|----------------------------------------------------------|--------------------------------|
| Kirsch (2004, p. 383)                  | The IS Managing Director provides another example: “I typically do the walk around management style and check up with people, both the checking up from a technical standpoint and also checking up from a user standpoint, the user liaison, to get their feelings on how they feel that things are progressing.”                                                                                                                                      | Value appropriation (Information asymmetry)              | Behavior control, Clan control |
| Choudhury and Sabherwal (2003, p. 307) | “It was at that point we realized we were in trouble and we started getting into our daily meetings and tight control over everything that was happening and working with them, very closely monitoring them.” [IS project manager] ...none of the software would pass the test the first time around. To overcome this problem, [the] IS director called [the vendor’s] president to encourage better self-control (especially in terms of testing)... | Value appropriation (Performance problems, Moral hazard) | Formal control, Self-control   |
| Chua et al. (2012, p. 589)             | Unlike the earlier appointment, this “screening and interview process was conducted by both the vendor and corporate management, who emphasized ‘ability to fit’ in the hiring interview.” [Project manager]                                                                                                                                                                                                                                            | Value appropriation (Adverse selection)                  | Clan control                   |
| Heumann et al. (2015, p. 343)          | “The release manager must coordinate with each team leader. For example, if he says the time frame [for the next delivery] is three months then he would ask us how the different work packages were connected and whether delivery in time was possible at all.” [Team leader infrastructure]                                                                                                                                                          | Value creation (Coordination, Task interdependencies)    | Outcome control                |
| Kirsch (2004, p. 386)                  | ...to facilitate cooperation and coordination among stakeholders, formal plans and policies were put in place: “The control is your project plan. You know, making sure that you have got a well thought-out, detailed plan, by country, because all the steps, the resources assigned, who’s doing what to whom, and you know what your fallback position is if somebody slips” [Global implementation manager]                                        | Value creation (Cooperation, Task interdependencies)     | Behavior control               |
| Gregory et al. (2013, p. 1219)         | “We asked ourselves the question: How can we bring the team up to speed early on [...] One of the things we discussed was that we needed joint workshops in the beginning to establish common understanding, a joint working model, and deal with cultural differences.” [Client chief architect]                                                                                                                                                       | Value creation (Knowledge exchange, Cooperation)         | Behavior control, Clan control |

## Online Appendix B: Secondary Case Analysis (Results)

Table B1 reports the definitions of control stated in the 21 analyzed articles and classifies the definitions after underlying view of control (agency vs. stewardship theory).

**Table B1.** Definitions of Control in Analyzed Articles

| Reference                      | Control Definition (emphasis added)                                                                                                                                                                                                                                                            | Underlying View               |
|--------------------------------|------------------------------------------------------------------------------------------------------------------------------------------------------------------------------------------------------------------------------------------------------------------------------------------------|-------------------------------|
| Beck and Schott (2012)         | No definition provided.                                                                                                                                                                                                                                                                        | NA                            |
| Choudhury and Sabherwal (2003) | "This paper views control broadly, in a behavioral sense (Jaworski 1988, Kirsch 1996, 1997), as attempting to ensure individuals act in a manner that is <i>consistent</i> with achieving desired objectives." (p. 292)                                                                        | Agency theory                 |
| Chua et al. (2012)             | "A portfolio of controls comprising formal and informal controls is needed to <i>align</i> the efforts of stakeholders." (p. 577-578)                                                                                                                                                          | Agency theory                 |
| Conboy (2010)                  | "...control is exerted over the three main axes of project management, namely <i>time, cost and scope</i> ." (p. 274)                                                                                                                                                                          | Agency theory                 |
| Cram and Brohman (2013)        | "...control refers to the process used to influence project stakeholders [...] to behave in a way that is <i>consistent</i> with the achievement of project and organisational goals." (p. 137)                                                                                                | Agency theory                 |
| Gregory et al. (2013)          | "In order for organizations, including temporary organizations such as projects, to achieve their objectives, some type of strategy must be implemented that 'effectively controls members' activities in a manner <i>functional</i> for the organization' (Barker 1993, p. 409)." (p. 1212)   | Agency theory                 |
| Gregory and Keil (2014)        | "...control is viewed from a behavioural perspective as an attempt to motivate individuals to act in a way that is <i>consistent</i> with organizational goals and objectives (Kirsch, 1996)." (p. 344)                                                                                        | Agency theory                 |
| Harris et al. (2009)           | "...controls to ensure that team decisions are <i>congruent</i> with organizational objectives." (p. 401)                                                                                                                                                                                      | Agency theory                 |
| Heiskanen et al. (2008)        | "...establishing control mechanisms makes the attainment of desirable outcomes more probable and <i>reduces the level of risks</i> " (p. 269)                                                                                                                                                  | Agency theory                 |
| Heumann et al. (2015)          | "...control is defined as 'attempts to ensure that individuals working on organizational projects <i>act according to</i> an agreed-upon strategy to achieve desired objectives' (Kirsch, 1996: 1)." (p. 338)                                                                                  | Agency theory                 |
| Kirsch (1997)                  | "Exercising control is one powerful approach that managers can use to <i>ensure progress by fusing together</i> the complementary roles and capabilities of [IS] project participants, motivating individuals to <i>work in accordance with</i> organizational goals and objectives." (p. 215) | Agency and stewardship theory |
| Kirsch (2004)                  | "...control, which is viewed broadly to mean any attempt to motivate individuals to behave in a manner <i>consistent</i> with organizational objectives" (p. 374)                                                                                                                              | Agency theory                 |
| Kirsch and Cummings (1996)     | "...exercise of control: that is, a manager attempts to guide the project team to act in a manner that is conducive to organizational goals and objectives to <i>ensure</i> that the resulting system meets the needs of the organization." (p. 191)                                           | Agency theory                 |
| Mao et al. (2008)              | "Control refers to actions taken to <i>regulate or adjust</i> the behavior of the controllee (Kirsch 1996)." (p. 2)                                                                                                                                                                            | Agency theory                 |

|                                                |                                                                                                                                                                                                                                                             |               |
|------------------------------------------------|-------------------------------------------------------------------------------------------------------------------------------------------------------------------------------------------------------------------------------------------------------------|---------------|
| McBride (2008)                                 | "Project [control] is the gathering of information to determine the current state and progress of the project <i>in relation to its expected state and progress</i> " (p. 2386)                                                                             | Agency theory |
| Persson et al. (2011)                          | "Control is used broadly to denote any attempt to motivate individuals to behave in a manner <i>consistent</i> with organisational objectives (Ouchi, 1979, Kirsch, 2004)." (p. 4)                                                                          | Agency theory |
| Prifling et al. (2008)                         | No definition provided.                                                                                                                                                                                                                                     | NA            |
| Prifling et al. (2009)                         | No definition provided.                                                                                                                                                                                                                                     | NA            |
| Remus and Wiener (2012)                        | "This view implies that when a controller exercises control over a controllee, the controller is taking some action to <i>regulate or adjust</i> the behavior of the controllee (Kirsch, 1996)." (p. 3)                                                     | Agency theory |
| Soh et al. (2010)                              | "...a controller (e.g., the project manager) applies a portfolio of controls on controllees (e.g., the project team members) to <i>ensure</i> the achievement of project goals (Kirsch, 1996, 1997)." (p. 16)                                               | Agency theory |
| Zhang et al. (2007)                            | "Control, a tool for managing projects, is a set of mechanisms that is used by management to motivate team members to behave in a manner that is <i>consistent</i> with organizational norms and project requirements (Choudhury & Sabherwal 2003)." (p. 2) | Agency theory |
| Note: References listed in alphabetical order. |                                                                                                                                                                                                                                                             |               |

Table B2 summarizes the manifestations of value-appropriation concerns (e.g., goal incongruence) and value-creation requirements (e.g., task interdependencies) identified in the analyzed case studies.

**Table B2.** Empirical Manifestations of Different Control Purposes in Analyzed Articles

| Reference<br>IS project type                                      | Manifestations of<br>Value-Appropriation Concerns                                                                                                                                            | Manifestations of<br>Value-Creation Requirements                                                                                                       |
|-------------------------------------------------------------------|----------------------------------------------------------------------------------------------------------------------------------------------------------------------------------------------|--------------------------------------------------------------------------------------------------------------------------------------------------------|
| Beck and Schott (2012)<br>Outsourced<br>(global)                  | Goal incongruence (divergent values), Information asymmetry (project progress), Performance problems, Moral hazard (bargaining behavior)                                                     | Task interdependencies, Inter-vendor cooperation, Knowledge exchange (joint reflection, inter-organizational learning)                                 |
| Choudhury and Sabherwal (2003)<br>Outsourced<br>(partly offshore) | Performance concerns and problems (quality and time), Information asymmetry (difficulty in monitoring vendor behavior), Adverse selection (project manager), Moral hazard (software testing) | Collaboration (system showcase), Knowledge transfer (testing procedures), Task complexity                                                              |
| Chua et al. (2012)<br>Internal                                    | Performance concerns and problems (quality), Goal incongruence, Adverse selection (primary vendor manager, uncooperative consultants)                                                        | Task complexity and uncertainty, Transfer of domain knowledge, Knowledge exchange (between business unit representatives and consultants), Cooperation |
| Conboy (2010)<br>Internal                                         | Performance concerns and problems (budget), Moral hazard                                                                                                                                     | Task complexity (context)                                                                                                                              |

|                                                  |                                                                                                                                                                                                         |                                                                                                                                                                                       |
|--------------------------------------------------|---------------------------------------------------------------------------------------------------------------------------------------------------------------------------------------------------------|---------------------------------------------------------------------------------------------------------------------------------------------------------------------------------------|
| Cram and Brohman (2013)<br>Internal              | Information asymmetry (project cost and progress), Performance concerns (scope creep)                                                                                                                   | Task interdependencies, complexity, and uncertainty (via agile development approach), Knowledge exchange (between developers)                                                         |
| Gregory et al. (2013)<br>Outsourced (offshore)   | Performance problems (quality and time), Goal incongruence (divergent expectations), Information asymmetry (project status and vendor processes)                                                        | Cooperation (in various phases), Knowledge exchange, Task complexity (testing process), Transfer of business-functional knowledge                                                     |
| Gregory and Keil (2014)<br>Internal              | Information asymmetry (transparency of project progress), Performance concerns and problems, Goal incongruence                                                                                          | Task interdependencies, Knowledge exchange, Participation, Collaboration                                                                                                              |
| Harris et al. (2009)<br>Internal                 | Performance concerns (bounded scope, quality, time pressure)                                                                                                                                            | Cooperation (of development units), Task complexity and uncertainty, Participation (agile development approach)                                                                       |
| Heiskanen et al. (2008)<br>Outsourced            | Performance problems (time, quality), Moral hazard (opportunistic behavior)                                                                                                                             | Cooperation                                                                                                                                                                           |
| Heumann et al. (2015)<br>Internal                | Information asymmetry (across hierarchical levels), Moral hazard (team member shirking), Performance concerns (efficiency), Performance problems                                                        | Task complexity, Task interdependencies, Coordination (among managers and team leaders), Knowledge exchange and transfer (local and global transparency)                              |
| Kirsch (1997)<br>Internal                        | Goal incongruence (different expectations), Information asymmetry (project progress), Performance concerns (danger of missing deadlines)                                                                | Knowledge exchange, Cooperation (among remotely located team members), Participation, Task interdependencies (interrelated project)                                                   |
| Kirsch (2004)<br>Internal (globally distributed) | Information asymmetry (progress), Goal incongruence (lack of commitment), Moral hazard (accountabilities and responsibilities), Performance problems (local vs. global requirements), Adverse selection | Cooperation and collaboration, Participation (user), Knowledge transfer (domain knowledge), Task complexity (project/software scope), Task interdependencies (between project phases) |
| Kirsch and Cummings (1996)<br>Internal           | Performance concerns and problems (quality and time), Information asymmetry (performance evaluation)                                                                                                    | Task complexity, Coordination (by progress reports and informal communication)                                                                                                        |
| Mao et al. (2008)<br>Internal                    | Performance problems (time issues), Moral hazard (power struggle and internal conflicts), Adverse selection (developers)                                                                                | Knowledge exchange (mutual learning), Transfer of domain knowledge, User participation                                                                                                |
| McBride (2008)<br>Internal                       | Information asymmetry (project "health"), Performance problems and concerns                                                                                                                             | Task complexity (breakdown of work tasks), Cooperation                                                                                                                                |
| Persson et al. (2011)<br>Outsourced (nearshore)  | Goal incongruence (divergent expectations), Information asymmetry (assess project progress through co-mapping tool), Performance problems (in prioritizing features)                                    | Task interdependencies (mutual dependence), Knowledge exchange (discussions)                                                                                                          |
| Prifling et al. (2008)<br>Outsourced (offshore)  | Performance problems (with project implementation), Moral hazard (risk and conflict avoidance attitude), Goal incongruence (between client and vendor), Information asymmetry (performance)             | Knowledge transfer (from client to vendor), Coordination (of work)                                                                                                                    |

|                                                        |                                                                                                                                                                                            |                                                                                                                                                                |
|--------------------------------------------------------|--------------------------------------------------------------------------------------------------------------------------------------------------------------------------------------------|----------------------------------------------------------------------------------------------------------------------------------------------------------------|
| Prifling et al. (2009)<br>Outsourced (offshore)        | Performance concerns (quality), Goal incongruence (mismatch in client-vendor expectations), Adverse selection (risk), Moral hazard (accusation of vendor)                                  | Task complexity (breakdown of workload, equal work split), Cooperation (joint development), Knowledge transfer (from client to vendor), Task interdependencies |
| Remus and Wiener (2012)<br>Outsourced (offshore)       | Moral hazard (perceived threat of opportunism, miscommunication), Performance problems (quality)                                                                                           | Task complexity and uncertainty, Cooperation (between onshore and offshore vendor teams)                                                                       |
| Soh et al. (2010)<br>Internal                          | Information asymmetry (work practices), Performance concerns and problems, Adverse selection (primary implementation partner manager), Moral hazard (insufficient responsiveness of users) | Cooperation (among stakeholder groups), Knowledge sharing (among stakeholders)                                                                                 |
| Zhang et al. (2007)<br>Internal (globally distributed) | Moral hazard (distrust), Performance problems, Information asymmetry, Goal incongruence                                                                                                    | NA                                                                                                                                                             |
| Note: References listed in alphabetical order.         |                                                                                                                                                                                            |                                                                                                                                                                |

## References<sup>1</sup>

- Andren G (1981) Reliability and content analysis. Rosengren KE, ed. *Advances in Content Analysis* (Sage, London), 43-68.
- \*Beck R, Schott K (2012) The interplay of project control and interorganizational learning: Mitigating effects on cultural differences in global, multisource ISD outsourcing projects. *Business & Information Systems Engineering* 4(4):183-192.
- \*Choudhury V, Sabherwal R (2003) Portfolios of control in outsourced software development projects. *Information Systems Research* 14(3):291-314.
- \*Chua CEH, Lim W-K, Soh C, Sia SK (2012) Enacting clan control in complex IT projects: A social capital perspective. *MIS Quarterly* 36(2):577-600.
- \*Conboy K (2010) Project failure en masse: A study of loose budgetary control in ISD projects. *European Journal of Information Systems* 19(3):273-287.
- \*Cram WA, Brohman MK (2013) Controlling information systems development: A new typology for an evolving field. *Information Systems Journal* 23(2):137-154.
- Eisenhardt KM (1989) Building theories from case study research. *Academy of Management Review* 14(4):532-550.

<sup>1</sup> Articles included in secondary case analysis are marked with an asterisk (\*).

- Gallivan MJ (2001) Striking a balance between trust and control in a virtual organization: A content analysis of open source software case studies. *Information Systems Journal* 11(4):277-304.
- \*Gregory RW, Beck R, Keil M (2013) Control balancing in information systems development offshoring projects. *MIS Quarterly* 37(4):1211-1232.
- \*Gregory RW, Keil M (2014) Blending bureaucratic and collaborative management styles to achieve control ambidexterity in IS projects. *European Journal of Information Systems* 23(3):343-356.
- Hanson L (2010) Secondary data as primary. Mill AJ, Durepos G, Wiebe E, eds. *Encyclopedia of Case Study Research* (Sage, Thousand Oaks, CA), 845-847.
- \*Harris ML, Collins RW, Hevner AR (2009) Control of flexible software development under uncertainty. *Information Systems Research* 20(3):400-419.
- \*Heiskanen A, Newman M, Eklin M (2008) Control, trust, power, and the dynamics of information system outsourcing relationships: A process study of contractual software development. *Journal of Strategic Information Systems* 17(4):268-286.
- \*Heumann J, Wiener M, Remus U, Mähring M (2015) To coerce or to enable? Exercising formal control in a large information systems project. *Journal of Information Technology* 30(4):337-351.
- \*Kirsch LJ (1997) Portfolios of control modes and IS project management. *Information Systems Research* 8(3):215-239.
- \*Kirsch LJ (2004) Deploying common systems globally: The dynamics of control. *Information Systems Research* 15(4):374-395.
- \*Kirsch LJ, Cummings LL (1996) Contextual influences on self-control of IS professionals engaged in systems development. *Accounting, Management and Information Technologies* 6(3):191-219.
- Landis JR, Koch GG (1977) The measurement of observer agreement for categorical data. *Biometrics* 33(1):159-174.
- \*Mao JY, Zhang X, Song W (2008) Information systems development in a low maturity environment: An exploratory case study on control modes. In: *Proceedings of the 12<sup>th</sup> Pacific Asia Conference on Information Systems (PACIS)*, Suzhou.
- \*McBride T (2008) The mechanisms of project management of software development. *Journal of Systems and Software* 81(12):2386-2395.
- \*Persson JS, Mathiassen L, Aaen I (2011) Agile distributed software development: Enacting control through media and context. *Information Systems Journal* 22(6):411-433.

- \*Prifling M, Gregory R, Beck R (2008) Project management techniques for managing cross-cultural differences in IT offshore outsourcing. In: *Proceedings of the 14<sup>th</sup> Americas Conference on Information Systems (AMCIS)*, Toronto.
- \*Prifling M, Gregory R, Beck R (2009) Changing psychological contracts and their effect on control modes in IT offshore outsourcing projects – A case from the financial services industry. In: *Proceedings of the 42<sup>nd</sup> Hawaii International Conference on System Sciences (HICSS)*, Waikoloa, Big Island, HI.
- \*Remus U, Wiener M (2012) The amount of control in offshore software development projects. *Journal of Global Information Management* 20(4):1-26.
- \*Soh C, Chua CEH, Singh H (2010) Managing diverse stakeholders in enterprise systems projects: A control portfolio approach. *Journal of Information Technology* 26(1):16-31.
- Wiener M, Remus U, Mähring M, Saunders C (2016) Control configuration and control enactment in information systems projects: Review and expanded theoretical framework. *MIS Quarterly* 40(3):741-774.
- \*Zhang M, Chand D, David G (2007) Exploring control modes in globally distributed IT work management. In: *Proceedings of the 13<sup>th</sup> Americas Conference on Information Systems (AMCIS)*, Keystone, CO.
